# Supplementary material for: Pair distribution function analysis of the reassembly step of the assembly-disassembly-organisation-reassembly (ADOR) process
Source: Royal Society of Chemistry journal article supplement (doi:10.1039/d2dt03389e), 2022-01-01
Supplement: d2dt03389e1.pdf [file d2dt03389e1.pdf]

## **Pair distribution function analysis of the reassembly step of the assembly-disassembly-organisation-reassembly (ADOR) process**

Samantha E. Russell, Fanny N. Costa, Maria Diaz-Lopez and Russell E. Morris

### **Synthesis Conditions**

The parent zeolite IM-12 (**UTL**) was synthesised following the literature procedure.<sup>1</sup> The material was calcined at 575 °C for 6 h with a heating ramp of 2 °C/min to remove the organic structure directing agent (SDA). A range of conditions were used to hydrolyse the calcined IM-12 (**UTL**) in an attempt to obtain the desired intermediate materials of IPC-1P, IPC-2P and IPC-6P. IPC-1P was formed by hydrolysing the UTL in water at 95 °C for 4 h, IPC-2P with 1.5 M hydrochloric acid at 95 °C for 20 h and IPC-6P with 2 M hydrochloric acid at 95 °C for 9 h.

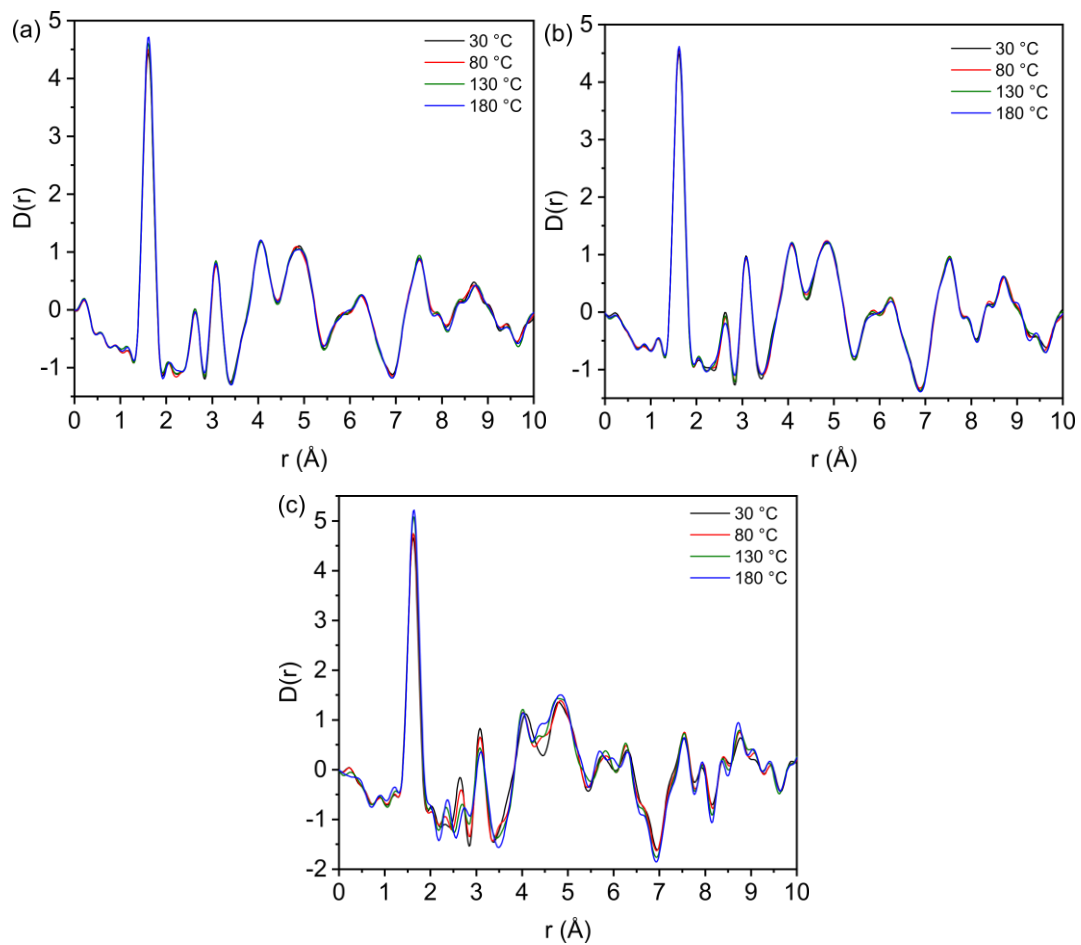

**Figure S1.** The low temperature 30 – 180 °C PDF data for the 0 – 10 Å region for (a) IPC-1P, (b) IPC-6P and (c) IPC-2P.

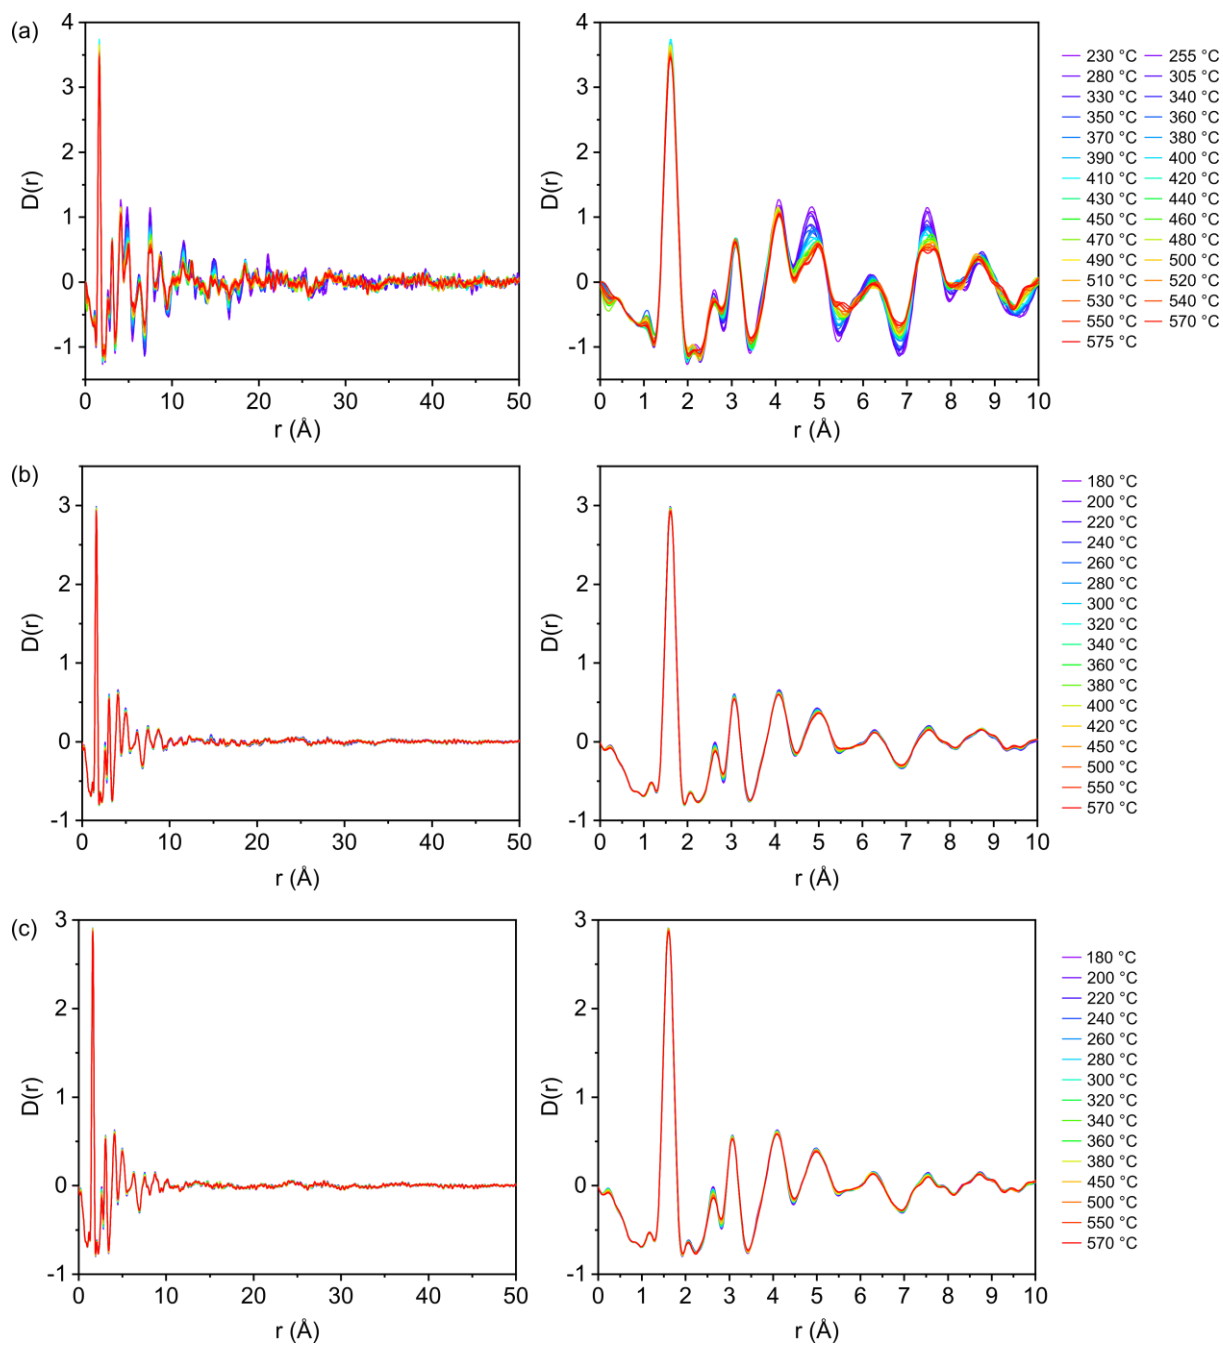

**Figure S2.** The full range of high temperature PDF data between 0 – 50 Å (left) and the zoomed region of 0 – 10 Å (right) for (a) IPC-1P, (b) IPC-6P and (c) IPC-2P.

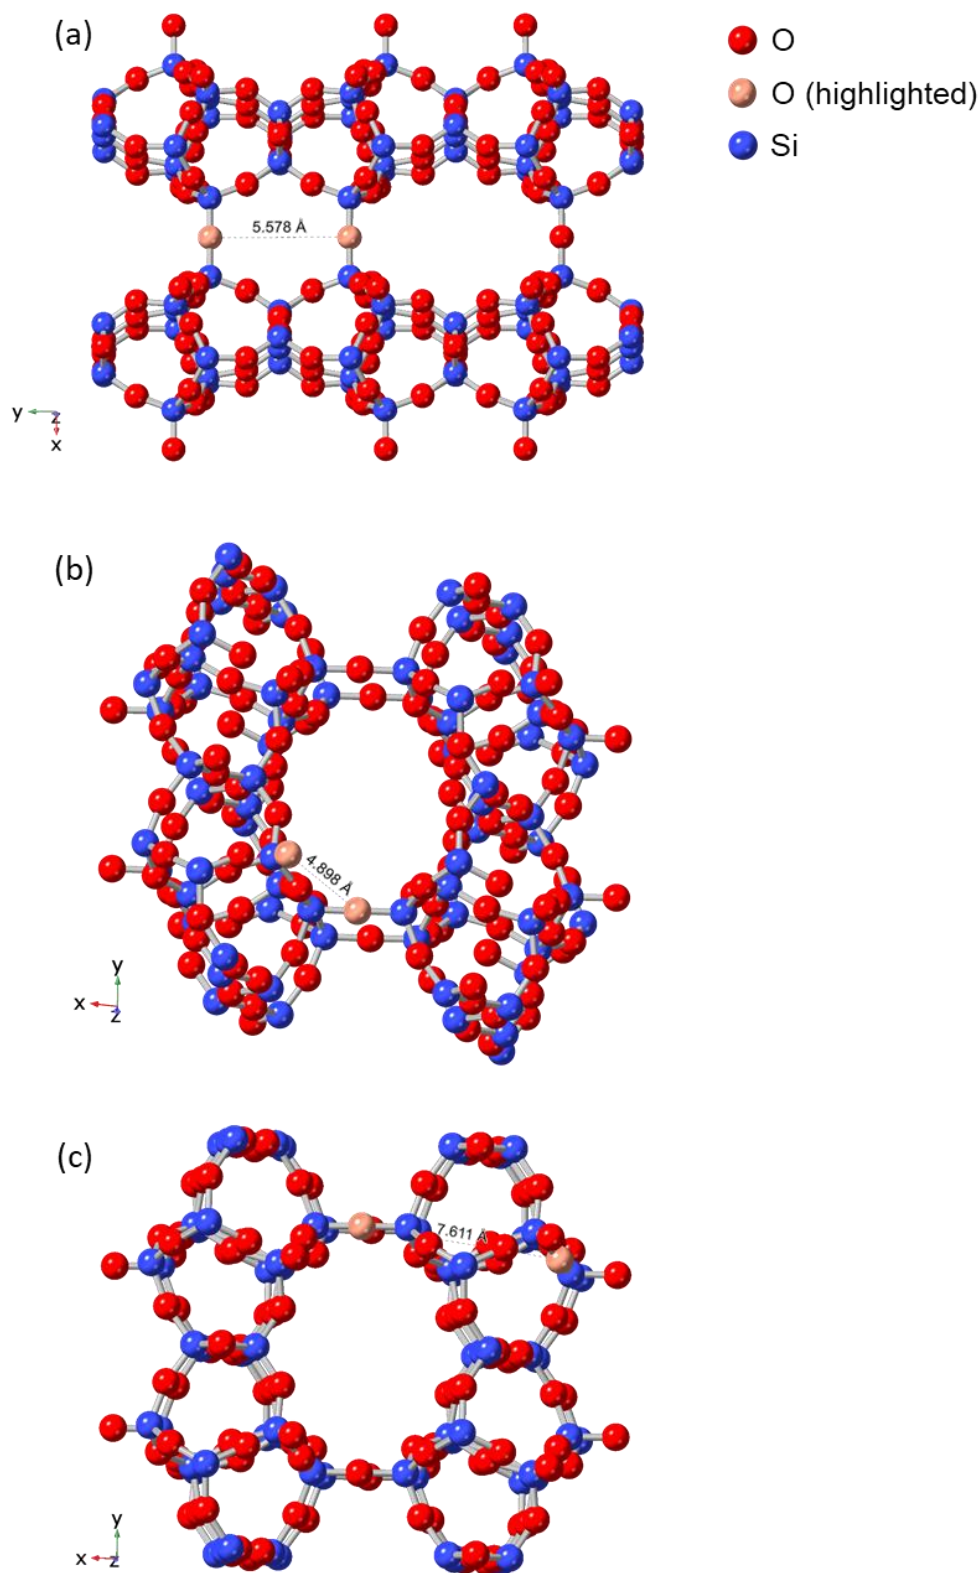

**Figure S3:** The IPC-4 crystal structure with the highlighted interatomic distances that were observed in the PDF data, where red are oxygen atoms, light pink are the highlighted oxygen atoms and blue are silicon atoms. (a) The distance of 5.6 Å between the two bridging oxygen atoms, (b) the 4.9 Å distance from the bridging oxygen to an "inner-edge" layer oxygen and (c) the 7.6 Å distance from the bridging oxygen to an "outer-edge" layer oxygen.

## **References**

1. S. E. Henkelis, S. A. Morris, M. Mazur, P. S. Wheatley, L. N. McHugh and R. E. Morris, *J. Mater. Chem. A*, 2018, **6**, 17011–17018.
